# Supplementary material for: Healthcare Cost and Patient Satisfaction: A Comparative Analysis Between Public and Private Hospitals in Bangladesh
Source: Research Square preprint supplement (doi:10.21203/rs.3.rs-325300/v1), 2021-03-24
Supplement: Supplementary file 1 [file ee087db9d455d750caf5c6a1.docx]

**Supplementary Table 1. Variables used in the study and their definitions**

| **Name of the Variables** | **Definition** |
| --- | --- |
| Age | Age reported in years at the time of admission |
| Age category | Age of the patient falling in any of the following 7 categories: 1 (<12), 2(12-23), 3 (24-35), 4 (36-47), 5 (48-59), 6(60-71), 7 (>72) |
| Sex | Gender of the patient either male or female |
| Seat or bed | Allocated or availed seat during admission. 6 categories: 1 (Floor), 2 (General ward), 3 (Paying bed), 4 (Cabin), 5 (ICU/CCU/HDU), 6 (NICU) |
| Duration of hospital stay | Duration of hospital stay was expressed in days |
| Hospital type | Type of hospital that the patient got admitted into for treatment.  2 types: Public (subsidized by the government) and Private (non-subsidized) |
| Socioeconomic conditions | Overall welfare status of the patient measured by minimum monthly income including wage and non-wage income from all the earning family members. Socioeconomic categories considered here were Poor, Lower-middle class, Middle class and Rich. |
| Type of treatment | Type of treatment received by the patient at the hospital. 2 categories: 1 (Operative), 2 (Conservative) |
| Outcome | Overall health status of the patient after being discharged from the hospital. 5 categories: 1 (Cured), 2 (Improved), 3 (No improvement), 4 (Deteriorated), 5 (Death) |
| Total expenses | Total spending at hospital for the purpose of diagnosis, treatment and care of the patient. It is expressed in BDT (US$). A breakdown of total expense can be found in the methodology section. |
| Admitted departments | Department that the patient is admitted into. 27 categories : 1 (Internal Medicine), 2 (Obstetrics and Gynaecology), 3 (Cardiology), 4 (Neurology), 5 (ENT), 6 (Orthopedics), 7 (Urology), 8 (Hepatobiliary pancreatic surgery), 9 (Gastroenterology), 10 (Endocrinology), 11 (Haematology), 12 (Nephrology), 13 (Hepatology), 14 (General surgery), 15 (Vascular surgery), 16 (Colorectal surgery), 17 (Oncology), 18 (Neuro surgery), 19 (Physical medicine), 20 (Chest medicine), 21 (Pediatrics), 22 (Plastic surgery), 23 (Pediatric surgery), 24 (Spine surgery), 25 (Dental surgery), 26 (Cardiac surgery), 27 (Psychiatry) |
| Satisfaction score | Extent of the satisfaction was measured by five-point Likert. Here, 1= highly dissatisfied, 2= dissatisfied, 3= neutral, 4= satisfied, and 5=highly satisfied. |
| Attending faculty | Admitting faculty based on admission were categorized into two major subheadings: Surgery and Medicine. Gynaecology and obstetrics department were included into the surgery faculty. |
